# Supplementary material for: Nutrient Scarcity in a New Defined Medium Reveals Metabolic Resistance to Antibiotics in the Fish Pathogen Piscirickettsia salmonis
Source: Front Microbiol. 2021 Oct 11;12:734239. doi: 10.3389/fmicb.2021.734239 (PMC8542936; doi:10.3389/fmicb.2021.734239)
Supplement: Supplementary file 4 [file Table_1.xlsx]

## Sheet: Hoja1
Supplementary table 1: Composition of culture media.
Reference		Cortés et al. 2017						This work	This work, M9 minimal media	This work, Chemically defined media for Legionella (Chamberlain, 1964)	This work, K-Ph buffer pH 6.2	This work
Medium name		CMM1	CMM1 glucose modifications	CMM1 vitamin modifications	CMM1 salt modifications	CMM1 iron modifications	CMM1 amino acid modifications	CMM minimal medium	CMM-M9	CMM-L64	CMM-KPh	CMMAB
Carbon source	Glucose	25 g/L	0 - 0.7 - 4 - 15 - 25 g/L	25 g/L	25 g/L	25 g/L	25 g/L	25 g/L	25 g/L	25 g/L	25 g/L	25 g/L
Aminoacids	Alanine	0.225 g/L	0.225 g/L	0.225 g/L	0.225 g/L	0.225 g/L	0- 0.225 - 0.9 g/L	-	-	-	-	-
	Arginine	0.7 g/L	0.7 g/L	0.7 g/L	0.7 g/L	0.7 g/L	0.7 - 1.4 g/L	1.4 g/L	1.4 g/L	1.4 g/L	1.4 g/L	1.4 g/L
	Asparagine	0.35 g/L	0.35 g/L	0.35 g/L	0.35 g/L	0.35 g/L	0 - 0.35 - 1.05 g/L	-	-	-	-	-
	Aspartic acid	0.35 g/L	0.35 g/L	0.35 g/L	0.35 g/L	0.35 g/L	0 - 0.35 - 0.7 g/L	0.7 g/L	0.7 g/L	0.7 g/L	0.7 g/L	0.7 g/L
	Glutamic acid	0.6 g/L	0.6 g/L	0.6 g/L	0.6 g/L	0.6 g/L	0 - 0.6 - 1.2 g/L	-	-	-	-	-
	Cysteine	1 g/L	1 g/L	1 g/L	1 g/L	1 g/L	1 g/L	1 g/L	1 g/L	1 g/L	1 g/L	1 g/L
	Glutamine	0.6 g/L	0.6 g/L	0.6 g/L	0.6 g/L	0.6 g/L	0 - 0.6 - 1.2 g/L	-	-	-	-	-
	Glycine	0.65 g/L	0.65 g/L	0.65 g/L	0.65 g/L	0.65 g/L	0 - 0.65 - 1.3 g/L	1.3 g/L	1.3 g/L	1.3 g/L	1.3 g/L	1.3 g/L
	Histidine	2.5 g/L	2.5 g/L	2.5 g/L	2.5 g/L	2.5 g/L	2.5 g/L	1.25 g/L	1.25 g/L	1.25 g/L	1.25 g/L	1.25 g/L
	Isoleucine	0.05 g/L	0.05 g/L	0.05 g/L	0.05 g/L	0.05 g/L	0.05 - 0.5 g/L	0.5 g/L	0.5 g/L	0.5 g/L	0.5 g/L	0.5 g/L
	Leucine	0.075 g/L	0.075 g/L	0.075 g/L	0.075 g/L	0.075 g/L	0.075 - 0.375 g/L	0.375 g/L	0.375 g/L	0.375 g/L	0.375 g/L	0.375 g/L
	Lysine	0.625 g/L	0.625 g/L	0.625 g/L	0.625 g/L	0.625 g/L	0 - 0.625 - 1 g/L	0.625 g/L	0.625 g/L	0.625 g/L	0.625 g/L	0.625 g/L
	Methionine	0.05 g/L	0.05 g/L	0.05 g/L	0.05 g/L	0.05 g/L	0.05 - 0.5 g/L	0.5 g/L	0.5 g/L	0.5 g/L	0.5 g/L	0.5 g/L
	Proline	0.35 g/L	0.35 g/L	0.35 g/L	0.35 g/L	0.35 g/L	0 - 0.35 -2.1 g/L	0.35 g/L	0.35 g/L	0.35 g/L	0.35 g/L	0.35 g/L
	Phenylalanine	0.15 g/L	0.15 g/L	0.15 g/L	0.15 g/L	0.15 g/L	0 - 0.15 - 0.45 g/L	0.15 g/L	0.15 g/L	0.15 g/L	0.15 g/L	0.15 g/L
	Serine	1.1 g/L	1.1 g/L	1.1 g/L	1.1 g/L	1.1 g/L	0 - 0.4 - 1.1 g/L	0.395 g/L	0.395 g/L	0.395 g/L	0.395 g/L	0.395 g/L
	Threonine	0.175 g/L	0.175 g/L	0.175 g/L	0.175 g/L	0.175 g/L	0 - 0.175 - 1.75 g/L	1.75 g/L	1.75 g/L	1.75 g/L	1.75 g/L	1.75 g/L
	Tryptophan	0.1 g/L	0.1 g/L	0.1 g/L	0.1 g/L	0.1 g/L	0 - 0.1 - 0.5 g/L	-	-	-	-	-
	Tyrosine	0.07202 g/L	0.07202 g/L	0.07202 g/L	0.07202 g/L	0.07202 g/L	0 - 0.07202 - 0.7202 g/L	-	-	-	-	-
	Valine	0.1 g/L	0.1 g/L	0.1 g/L	0.1 g/L	0.1 g/L	0.1 g/L	0.1 g/L	0.1 g/L	0.1 g/L	0.1 g/L	0.1 g/L
Choline stock	Choline chloride	0.2 mg/L	0.2 mg/L	0 - 0.2 mg/L	0.2 mg/L	0.2 mg/L	0.2 mg/L	0.2 mg/L	0.2 mg/L	0.2 mg/L	0.2 mg/L	0.2 mg/L
Vitamins	D-calcium pantothenate	20 µg/L	20 µg/L	0 - 20 µg/L	20 µg/L	20 µg/L	20 µg/L	20 µg/L	20 µg/L	20 µg/L	20 µg/L	20 µg/L
	Folic acid	20 µg/L	20 µg/L	0 - 20 µg/L	20 µg/L	20 µg/L	20 µg/L	20 µg/L	20 µg/L	20 µg/L	20 µg/L	20 µg/L
	Myo-inositol	20 µg/L	20 µg/L	0 - 20 µg/L	20 µg/L	20 µg/L	20 µg/L	20 µg/L	20 µg/L	20 µg/L	20 µg/L	20 µg/L
	Niacinamide	20 µg/L	20 µg/L	0 - 20 µg/L	20 µg/L	20 µg/L	20 µg/L	20 µg/L	20 µg/L	20 µg/L	20 µg/L	20 µg/L
	Pyridoxal HCI	20 µg/L	20 µg/L	0 - 20 µg/L	20 µg/L	20 µg/L	20 µg/L	20 µg/L	20 µg/L	20 µg/L	20 µg/L	20 µg/L
	D-biotin	20 µg/L	20 µg/L	0 - 20 µg/L	20 µg/L	20 µg/L	20 µg/L	20 µg/L	20 µg/L	20 µg/L	20 µg/L	20 µg/L
	Riboflavin	20 µg/L	20 µg/L	0 - 20 µg/L	20 µg/L	20 µg/L	20 µg/L	20 µg/L	20 µg/L	20 µg/L	20 µg/L	20 µg/L
	Thiamine HCI	20 µg/L	20 µg/L	0 - 20 µg/L	20 µg/L	20 µg/L	20 µg/L	20 µg/L	20 µg/L	20 µg/L	20 µg/L	20 µg/L
	Aminobenzoic acid	20 µg/L	20 µg/L	0 - 20 µg/L	20 µg/L	20 µg/L	20 µg/L	20 µg/L	20 µg/L	20 µg/L	20 µg/L	20 µg/L
Salt	NaCl	-	-	-	0- 0.5 - 10 - 15 g/L	-	-	10 g/L	10 g/L	10 g/L	10 g/L	10 g/L
Buffers and	KCl	2.24 g/L	2.24 g/L	2.24 g/L	2.24 g/L	2.24 g/L	2.24 g/L	2.24 g/L	-	-	-	-
stock salts	CaCl2·2H2O	1 g/L	1 g/L	1 g/L	1 g/L	1 g/L	1 g/L	1 g/L	11.098 mg/L	-	25 mg/L	36.8 mg/L**
	MgSO4·7H2O	1.35 g/L	1.35 g/L	1.35 g/L	1.35 g/L	1.35 g/L	1.35 g/L	1.35 g/L	494 mg/L	0.135 g/L	25 mg/L	-
	MgCl2·6H2O	1.068 g/L	1.068 g/L	1.068 g/L	1.068 g/L	1.068 g/L	1.068 g/L	1.068 g/L	-	-	-	83.6 mg/L**
	K2HPO4	-	-	-	-	-	-	-	-	1 g/L	0.89 g/L*	0.89 g/L*
	KH2PO4	-	-	-	-	-	-	-	3 g/L	1 g/L	2.7 g/L*	2.7 g/L*
	Na2HPO4	876.9 mg/L	876.9 mg/L	876.9 mg/L	876.9 mg/L	876.9 mg/L	876.9 mg/L	876.9 mg/L	6 g/L	-	-	-
	NaHCO3	0.35 g/L	0.35 g/L	0.35 g/L	0.35 g/L	0.35 g/L	0.35 g/L	0.35 g/L	-	-	-	-
	NH4Cl	-	-	-	-	-	-	-	1 g/L	-	-	-
Iron	FeSO4	10 mg/L	10 mg/L	10 mg/L	10 mg/L	0 - 2 - 10 mg/L	0 - 2 - 10 mg/L	-	-	-	-	-
	FeCl3	-	-	-	-	0.004 - 0.04- 0.4 - 2 mM	0.004 - 0.04 - 0.4 - 2 mM	40 µM	40 µM	40 µM	40 µM	40 µM
Micronutrients	(NH4)6Mo7O24·4H2O	-	-	-	-	-	-	-	3.71 µg/L	-	-	-
	H3BO3	-	-	-	-	-	-	-	24.7 µg/L	-	-	-
	CoCl2·6H2O	-	-	-	-	-	-	-	7.14 µg/L	-	-	-
	CuSO4·5H2O	-	-	-	-	-	-	-	2.5 µg/L	-	-	-
	MnCl2·4H2O	-	-	-	-	-	-	-	15.83 µg/L	-	-	-
	ZnSO4·7H2O	-	-	-	-	-	-	-	2.881 µg/L	-	-	-
	* red amino acids are not synthesized by P. salmonis										* approximate concentracion after adding 2.5% v/v of a K-Ph buffer with pH 6.2	**Cations adjusted to 20 mg/L Ca2+ and 10 mg/L Mg2+
												adjusted to pH 6.2 with NaOH 3M
